# Supplementary material for: MariClus: Your One-Stop Platform for Information on Marine Natural Products, Their Gene Clusters and Producing Organisms
Source: MDPI journal article supplement (doi:10.3390/md21080449), 2023-08-15
Supplement: s1 [file s1]

# MariClus: your one-stop platform for information on marine natural products, their gene clusters and producing organisms

Cedric Hermans <sup>1,†</sup>, Maarten L. De Mol <sup>2,†</sup>, Marieke Mispelaere <sup>1</sup>, Anne-Sofie De Rop <sup>2</sup>, Jeltien Rombaut <sup>2</sup>, Tesneem Nusayr <sup>3</sup>, Rebecca Creamer <sup>4</sup>, Sofie L. De Maeseneire <sup>2</sup>, Wim K. Soetaert <sup>2</sup> and Paco Hulpiau <sup>1,\*</sup>

<sup>1</sup> Bioinformatics Knowledge Center (BiKC), Campus Brugge Station, Howest University of Applied Sciences, Rijselstraat 5, 8200 Bruges, Belgium

<sup>2</sup> Centre for Industrial Biotechnology and Biocatalysis (InBio.be), Department of Biotechnology, Faculty of Bioscience Engineering, Ghent University, Coupure Links 653, 9000 Ghent, Belgium

<sup>3</sup> Life Sciences, Texas A&M-Corpus Christi, TX. 78412, USA

<sup>4</sup> Entomology, Plant Pathology, and Weed Science, New Mexico State University, Las Cruces, NM 88003, USA

\* Correspondence: [maarten.demol@ugent.be](mailto:maarten.demol@ugent.be); [paco.hulpiau@howest.be](mailto:paco.hulpiau@howest.be).

† These authors contributed equally to this work.

MariClus

Dashboard

Species

Clusters

Molecules

Contact

Tutorial

Search for species, clusters, molecules, articles...

Search

Salinispora tropica

Back to species

General

Taxonomy

Bacteria / Terrabacteria group / Actinomycetota / Actinomycetes / Micromonosporales / Micromonosporaceae / Salinispora

Description

This species produces the chemicals salinosporamide A and B which may be useful for cancer treatment.

Pubmed ID

19550008

Biosynthesis of the salinosporamide A polyketide synthase substrate chloroethylmalonyl-coenzyme A from S-adenosyl-L-methionine

17563368

Genome sequencing reveals complex secondary metabolome in the marine actinomycete Salinispora tropica

Collection

   

Genome accession

GCF\_000016425.1

FASTA

Search:

| Contig                                                                                        | Start        | End        | #genes in cluster | Type              | Predicted product                                                                                                                                                                                                                                                                                                                                                                                                                                                                                                                                                                                                                                                                                                                                                                                                                                                                                                                                                                                                                                                                                                                                                                                                                                                                                                                                                                                                                                                                                                                                                                                                                                                                                                                                                                                                                                                                                                                                                                                                                                                                                                                                                                                                                                                                                                                                                                                                                                                                                                                                                                                                                                                                                                                                                                                                                                                                                                                                                                                                                                                                                                                                                                                                                                                                                                                                                                                                                                                                                                                                                                                                                                                                                                                                                                                                                                                                                                                                                                                                                                                                                                                      |      |            |            |      |            |      |            |      |            |        |            |      |            |        |            |      |            |      |            |      |            |      |            |      |            |      |            |      |            |      |            |      |            |      |            |      |            |      |            |      |            |      |            |      |            |              |            |             |            |         |               |            |     |     |                   |           |               |            |     |      |       |     |               |            |     |     |       |     |               |            |     |     |       |           |               |            |     |     |       |          |               |            |     |     |                   |           |               |            |     |      |       |     |               |            |     |      |       |     |               |            |    |      |       |     |               |            |     |     |                   |           |               |            |     |     |       |           |               |            |     |     |       |           |               |            |     |     |       |           |               |            |     |     |       |           |               |            |     |     |       |          |               |            |     |      |       |     |               |            |     |     |       |           |               |            |     |     |       |           |               |            |     |     |       |           |
|-----------------------------------------------------------------------------------------------|--------------|------------|-------------------|-------------------|----------------------------------------------------------------------------------------------------------------------------------------------------------------------------------------------------------------------------------------------------------------------------------------------------------------------------------------------------------------------------------------------------------------------------------------------------------------------------------------------------------------------------------------------------------------------------------------------------------------------------------------------------------------------------------------------------------------------------------------------------------------------------------------------------------------------------------------------------------------------------------------------------------------------------------------------------------------------------------------------------------------------------------------------------------------------------------------------------------------------------------------------------------------------------------------------------------------------------------------------------------------------------------------------------------------------------------------------------------------------------------------------------------------------------------------------------------------------------------------------------------------------------------------------------------------------------------------------------------------------------------------------------------------------------------------------------------------------------------------------------------------------------------------------------------------------------------------------------------------------------------------------------------------------------------------------------------------------------------------------------------------------------------------------------------------------------------------------------------------------------------------------------------------------------------------------------------------------------------------------------------------------------------------------------------------------------------------------------------------------------------------------------------------------------------------------------------------------------------------------------------------------------------------------------------------------------------------------------------------------------------------------------------------------------------------------------------------------------------------------------------------------------------------------------------------------------------------------------------------------------------------------------------------------------------------------------------------------------------------------------------------------------------------------------------------------------------------------------------------------------------------------------------------------------------------------------------------------------------------------------------------------------------------------------------------------------------------------------------------------------------------------------------------------------------------------------------------------------------------------------------------------------------------------------------------------------------------------------------------------------------------------------------------------------------------------------------------------------------------------------------------------------------------------------------------------------------------------------------------------------------------------------------------------------------------------------------------------------------------------------------------------------------------------------------------------------------------------------------------------------------------|------|------------|------------|------|------------|------|------------|------|------------|--------|------------|------|------------|--------|------------|------|------------|------|------------|------|------------|------|------------|------|------------|------|------------|------|------------|------|------------|------|------------|------|------------|------|------------|------|------------|------|------------|------|------------|------|------------|--------------|------------|-------------|------------|---------|---------------|------------|-----|-----|-------------------|-----------|---------------|------------|-----|------|-------|-----|---------------|------------|-----|-----|-------|-----|---------------|------------|-----|-----|-------|-----------|---------------|------------|-----|-----|-------|----------|---------------|------------|-----|-----|-------------------|-----------|---------------|------------|-----|------|-------|-----|---------------|------------|-----|------|-------|-----|---------------|------------|----|------|-------|-----|---------------|------------|-----|-----|-------------------|-----------|---------------|------------|-----|-----|-------|-----------|---------------|------------|-----|-----|-------|-----------|---------------|------------|-----|-----|-------|-----------|---------------|------------|-----|-----|-------|-----------|---------------|------------|-----|-----|-------|----------|---------------|------------|-----|------|-------|-----|---------------|------------|-----|-----|-------|-----------|---------------|------------|-----|-----|-------|-----------|---------------|------------|-----|-----|-------|-----------|
|  NC_009380.1 | 653599       | 698397     | 41                | T1PKS             | <div>Show all molecules for this cluster</div>                                                                                                                                                                                                                                                                                                                                                                                                                                                                                                                                                                                                                                                                                                                                                                                                                                                                                                                                                                                                                                                                                                                                                                                                                                                                                                                                                                                                                                                                                                                                                                                                                                                                                                                                                                                                                                                                                                                                                                                                                                                                                                                                                                                                                                                                                                                                                                                                                                                                                                                                                                                                                                                                                                                                                                                                                                                                                                                                                                                                                                                                                                                                                                                                                                                                                                                                                                                                                                                                                                                                                                                                                                                                                                                                                                                                                                                                                                                                                                                                                                                                                         |      |            |            |      |            |      |            |      |            |        |            |      |            |        |            |      |            |      |            |      |            |      |            |      |            |      |            |      |            |      |            |      |            |      |            |      |            |      |            |      |            |      |            |      |            |              |            |             |            |         |               |            |     |     |                   |           |               |            |     |      |       |     |               |            |     |     |       |     |               |            |     |     |       |           |               |            |     |     |       |          |               |            |     |     |                   |           |               |            |     |      |       |     |               |            |     |      |       |     |               |            |    |      |       |     |               |            |     |     |                   |           |               |            |     |     |       |           |               |            |     |     |       |           |               |            |     |     |       |           |               |            |     |     |       |           |               |            |     |     |       |          |               |            |     |      |       |     |               |            |     |     |       |           |               |            |     |     |       |           |               |            |     |     |       |           |
|  NC_009380.1 | 736985       | 779496     | 38                | NRP               |                                                                                                                                                                                                                                                                                                                                                                                                                                                                                                                                                                                                                                                                                                                                                                                                                                                                                                                                                                                                                                                                                                                                                                                                                                                                                                                                                                                                                                                                                                                                                                                                                                                                                                                                                                                                                                                                                                                                                                                                                                                                                                                                                                                                                                                                                                                                                                                                                                                                                                                                                                                                                                                                                                                                                                                                                                                                                                                                                                                                                                                                                                                                                                                                                                                                                                                                                                                                                                                                                                                                                                                                                                                                                                                                                                                                                                                                                                                                                                                                                                                                                                                                        |      |            |            |      |            |      |            |      |            |        |            |      |            |        |            |      |            |      |            |      |            |      |            |      |            |      |            |      |            |      |            |      |            |      |            |      |            |      |            |      |            |      |            |      |            |              |            |             |            |         |               |            |     |     |                   |           |               |            |     |      |       |     |               |            |     |     |       |     |               |            |     |     |       |           |               |            |     |     |       |          |               |            |     |     |                   |           |               |            |     |      |       |     |               |            |     |      |       |     |               |            |    |      |       |     |               |            |     |     |                   |           |               |            |     |     |       |           |               |            |     |     |       |           |               |            |     |     |       |           |               |            |     |     |       |           |               |            |     |     |       |          |               |            |     |      |       |     |               |            |     |     |       |           |               |            |     |     |       |           |               |            |     |     |       |           |
|  NC_009380.1 | 1016172      | 1031000    | 12                | NAGGN             |                                                                                                                                                                                                                                                                                                                                                                                                                                                                                                                                                                                                                                                                                                                                                                                                                                                                                                                                                                                                                                                                                                                                                                                                                                                                                                                                                                                                                                                                                                                                                                                                                                                                                                                                                                                                                                                                                                                                                                                                                                                                                                                                                                                                                                                                                                                                                                                                                                                                                                                                                                                                                                                                                                                                                                                                                                                                                                                                                                                                                                                                                                                                                                                                                                                                                                                                                                                                                                                                                                                                                                                                                                                                                                                                                                                                                                                                                                                                                                                                                                                                                                                                        |      |            |            |      |            |      |            |      |            |        |            |      |            |        |            |      |            |      |            |      |            |      |            |      |            |      |            |      |            |      |            |      |            |      |            |      |            |      |            |      |            |      |            |      |            |              |            |             |            |         |               |            |     |     |                   |           |               |            |     |      |       |     |               |            |     |     |       |     |               |            |     |     |       |           |               |            |     |     |       |          |               |            |     |     |                   |           |               |            |     |      |       |     |               |            |     |      |       |     |               |            |    |      |       |     |               |            |     |     |                   |           |               |            |     |     |       |           |               |            |     |     |       |           |               |            |     |     |       |           |               |            |     |     |       |           |               |            |     |     |       |          |               |            |     |      |       |     |               |            |     |     |       |           |               |            |     |     |       |           |               |            |     |     |       |           |
|  NC_009380.1 | 1131284      | 1180343    | 31                | transAT_PKS-like  | <div>Cum. BLAST score: 22414   Known cluster coverage: 7%    salinosporamide A <br/>Cum. BLAST score: 17472   Known cluster coverage: 90.48%    salinosporamide A <br/>Cluster Information<br/>BGC Cluster <a href="#">BGC00001145</a><br/>Source salinosporamide A<br/>Type NRP-Polyketide<br/>Number of proteins with BLAST hits to this cluster out of total genes in cluster 19 / 21 (90.48%)<br/>Cumulative BLAST score 17472.0<br/>Genes<br/><table><thead><tr><th>Gene</th><th>Annotation</th></tr></thead><tbody><tr><td>ABP73634.1</td><td>SalU</td></tr><tr><td>ABP73635.1</td><td>SalT</td></tr><tr><td>ABP73636.1</td><td>SalS</td></tr><tr><td>ABP73637.1</td><td>SalRll</td></tr><tr><td>ABP73638.1</td><td>SalQ</td></tr><tr><td>ABP73639.1</td><td>SalRll</td></tr><tr><td>ABP73640.1</td><td>SalO</td></tr><tr><td>ABP73641.1</td><td>SalN</td></tr><tr><td>ABP73642.1</td><td>SalM</td></tr><tr><td>ABP73643.1</td><td>SalL</td></tr><tr><td>ABP73644.1</td><td>SalK</td></tr><tr><td>ABP73645.1</td><td>SalA</td></tr><tr><td>ABP73646.1</td><td>SalB</td></tr><tr><td>ABP73647.1</td><td>SalC</td></tr><tr><td>ABP73648.1</td><td>SalD</td></tr><tr><td>ABP73649.1</td><td>SalE</td></tr><tr><td>ABP73650.1</td><td>SalF</td></tr><tr><td>ABP73651.1</td><td>SalG</td></tr><tr><td>ABP73652.1</td><td>SalH</td></tr><tr><td>ABP73653.1</td><td>SalI</td></tr><tr><td>ABP73654.1</td><td>SalJ</td></tr></tbody></table><br/>Blast Hits<br/><table><thead><tr><th>Query Gene</th><th>Subject Gene</th><th>% Identity</th><th>Blast Score</th><th>% Coverage</th><th>E-value</th></tr></thead><tbody><tr><td>STROP_RS05145</td><td>ABP73653.1</td><td>100</td><td>531</td><td>98.58156028368793</td><td>1.47e-193</td></tr><tr><td>STROP_RS05150</td><td>ABP73652.1</td><td>100</td><td>1148</td><td>100.0</td><td>0.0</td></tr><tr><td>STROP_RS05155</td><td>ABP73651.1</td><td>100</td><td>927</td><td>100.0</td><td>0.0</td></tr><tr><td>STROP_RS05160</td><td>ABP73650.1</td><td>100</td><td>578</td><td>100.0</td><td>5.85e-212</td></tr><tr><td>STROP_RS05165</td><td>ABP73649.1</td><td>100</td><td>160</td><td>100.0</td><td>1.53e-53</td></tr><tr><td>STROP_RS05170</td><td>ABP73648.1</td><td>100</td><td>840</td><td>96.11764705882354</td><td>6.95e-311</td></tr><tr><td>STROP_RS05175</td><td>ABP73647.1</td><td>100</td><td>1198</td><td>100.0</td><td>0.0</td></tr><tr><td>STROP_RS05180</td><td>ABP73646.1</td><td>100</td><td>1232</td><td>100.0</td><td>0.0</td></tr><tr><td>STROP_RS05185</td><td>ABP73645.1</td><td>99</td><td>3996</td><td>100.0</td><td>0.0</td></tr><tr><td>STROP_RS05190</td><td>ABP73644.1</td><td>100</td><td>551</td><td>96.89655172412794</td><td>2.69e-201</td></tr><tr><td>STROP_RS05195</td><td>ABP73643.1</td><td>100</td><td>576</td><td>100.0</td><td>2.68e-211</td></tr><tr><td>STROP_RS05200</td><td>ABP73642.1</td><td>100</td><td>497</td><td>100.0</td><td>5.51e-181</td></tr><tr><td>STROP_RS05205</td><td>ABP73641.1</td><td>100</td><td>522</td><td>100.0</td><td>1.31e-190</td></tr><tr><td>STROP_RS05210</td><td>ABP73640.1</td><td>100</td><td>578</td><td>100.0</td><td>2.04e-212</td></tr><tr><td>STROP_RS05215</td><td>ABP73639.1</td><td>100</td><td>419</td><td>100.0</td><td>6.9e-151</td></tr><tr><td>STROP_RS05220</td><td>ABP73638.1</td><td>100</td><td>2221</td><td>100.0</td><td>0.0</td></tr><tr><td>STROP_RS05225</td><td>ABP73637.1</td><td>100</td><td>656</td><td>100.0</td><td>6.28e-241</td></tr><tr><td>STROP_RS05230</td><td>ABP73636.1</td><td>100</td><td>305</td><td>100.0</td><td>3.37e-108</td></tr><tr><td>STROP_RS05235</td><td>ABP73635.1</td><td>100</td><td>537</td><td>100.0</td><td>1.94e-196</td></tr></tbody></table><div>Show all molecules for this cluster</div></div> | Gene | Annotation | ABP73634.1 | SalU | ABP73635.1 | SalT | ABP73636.1 | SalS | ABP73637.1 | SalRll | ABP73638.1 | SalQ | ABP73639.1 | SalRll | ABP73640.1 | SalO | ABP73641.1 | SalN | ABP73642.1 | SalM | ABP73643.1 | SalL | ABP73644.1 | SalK | ABP73645.1 | SalA | ABP73646.1 | SalB | ABP73647.1 | SalC | ABP73648.1 | SalD | ABP73649.1 | SalE | ABP73650.1 | SalF | ABP73651.1 | SalG | ABP73652.1 | SalH | ABP73653.1 | SalI | ABP73654.1 | SalJ | Query Gene | Subject Gene | % Identity | Blast Score | % Coverage | E-value | STROP_RS05145 | ABP73653.1 | 100 | 531 | 98.58156028368793 | 1.47e-193 | STROP_RS05150 | ABP73652.1 | 100 | 1148 | 100.0 | 0.0 | STROP_RS05155 | ABP73651.1 | 100 | 927 | 100.0 | 0.0 | STROP_RS05160 | ABP73650.1 | 100 | 578 | 100.0 | 5.85e-212 | STROP_RS05165 | ABP73649.1 | 100 | 160 | 100.0 | 1.53e-53 | STROP_RS05170 | ABP73648.1 | 100 | 840 | 96.11764705882354 | 6.95e-311 | STROP_RS05175 | ABP73647.1 | 100 | 1198 | 100.0 | 0.0 | STROP_RS05180 | ABP73646.1 | 100 | 1232 | 100.0 | 0.0 | STROP_RS05185 | ABP73645.1 | 99 | 3996 | 100.0 | 0.0 | STROP_RS05190 | ABP73644.1 | 100 | 551 | 96.89655172412794 | 2.69e-201 | STROP_RS05195 | ABP73643.1 | 100 | 576 | 100.0 | 2.68e-211 | STROP_RS05200 | ABP73642.1 | 100 | 497 | 100.0 | 5.51e-181 | STROP_RS05205 | ABP73641.1 | 100 | 522 | 100.0 | 1.31e-190 | STROP_RS05210 | ABP73640.1 | 100 | 578 | 100.0 | 2.04e-212 | STROP_RS05215 | ABP73639.1 | 100 | 419 | 100.0 | 6.9e-151 | STROP_RS05220 | ABP73638.1 | 100 | 2221 | 100.0 | 0.0 | STROP_RS05225 | ABP73637.1 | 100 | 656 | 100.0 | 6.28e-241 | STROP_RS05230 | ABP73636.1 | 100 | 305 | 100.0 | 3.37e-108 | STROP_RS05235 | ABP73635.1 | 100 | 537 | 100.0 | 1.94e-196 |
| Gene                                                                                          | Annotation   |            |                   |                   |                                                                                                                                                                                                                                                                                                                                                                                                                                                                                                                                                                                                                                                                                                                                                                                                                                                                                                                                                                                                                                                                                                                                                                                                                                                                                                                                                                                                                                                                                                                                                                                                                                                                                                                                                                                                                                                                                                                                                                                                                                                                                                                                                                                                                                                                                                                                                                                                                                                                                                                                                                                                                                                                                                                                                                                                                                                                                                                                                                                                                                                                                                                                                                                                                                                                                                                                                                                                                                                                                                                                                                                                                                                                                                                                                                                                                                                                                                                                                                                                                                                                                                                                        |      |            |            |      |            |      |            |      |            |        |            |      |            |        |            |      |            |      |            |      |            |      |            |      |            |      |            |      |            |      |            |      |            |      |            |      |            |      |            |      |            |      |            |      |            |              |            |             |            |         |               |            |     |     |                   |           |               |            |     |      |       |     |               |            |     |     |       |     |               |            |     |     |       |           |               |            |     |     |       |          |               |            |     |     |                   |           |               |            |     |      |       |     |               |            |     |      |       |     |               |            |    |      |       |     |               |            |     |     |                   |           |               |            |     |     |       |           |               |            |     |     |       |           |               |            |     |     |       |           |               |            |     |     |       |           |               |            |     |     |       |          |               |            |     |      |       |     |               |            |     |     |       |           |               |            |     |     |       |           |               |            |     |     |       |           |
| ABP73634.1                                                                                    | SalU         |            |                   |                   |                                                                                                                                                                                                                                                                                                                                                                                                                                                                                                                                                                                                                                                                                                                                                                                                                                                                                                                                                                                                                                                                                                                                                                                                                                                                                                                                                                                                                                                                                                                                                                                                                                                                                                                                                                                                                                                                                                                                                                                                                                                                                                                                                                                                                                                                                                                                                                                                                                                                                                                                                                                                                                                                                                                                                                                                                                                                                                                                                                                                                                                                                                                                                                                                                                                                                                                                                                                                                                                                                                                                                                                                                                                                                                                                                                                                                                                                                                                                                                                                                                                                                                                                        |      |            |            |      |            |      |            |      |            |        |            |      |            |        |            |      |            |      |            |      |            |      |            |      |            |      |            |      |            |      |            |      |            |      |            |      |            |      |            |      |            |      |            |      |            |              |            |             |            |         |               |            |     |     |                   |           |               |            |     |      |       |     |               |            |     |     |       |     |               |            |     |     |       |           |               |            |     |     |       |          |               |            |     |     |                   |           |               |            |     |      |       |     |               |            |     |      |       |     |               |            |    |      |       |     |               |            |     |     |                   |           |               |            |     |     |       |           |               |            |     |     |       |           |               |            |     |     |       |           |               |            |     |     |       |           |               |            |     |     |       |          |               |            |     |      |       |     |               |            |     |     |       |           |               |            |     |     |       |           |               |            |     |     |       |           |
| ABP73635.1                                                                                    | SalT         |            |                   |                   |                                                                                                                                                                                                                                                                                                                                                                                                                                                                                                                                                                                                                                                                                                                                                                                                                                                                                                                                                                                                                                                                                                                                                                                                                                                                                                                                                                                                                                                                                                                                                                                                                                                                                                                                                                                                                                                                                                                                                                                                                                                                                                                                                                                                                                                                                                                                                                                                                                                                                                                                                                                                                                                                                                                                                                                                                                                                                                                                                                                                                                                                                                                                                                                                                                                                                                                                                                                                                                                                                                                                                                                                                                                                                                                                                                                                                                                                                                                                                                                                                                                                                                                                        |      |            |            |      |            |      |            |      |            |        |            |      |            |        |            |      |            |      |            |      |            |      |            |      |            |      |            |      |            |      |            |      |            |      |            |      |            |      |            |      |            |      |            |      |            |              |            |             |            |         |               |            |     |     |                   |           |               |            |     |      |       |     |               |            |     |     |       |     |               |            |     |     |       |           |               |            |     |     |       |          |               |            |     |     |                   |           |               |            |     |      |       |     |               |            |     |      |       |     |               |            |    |      |       |     |               |            |     |     |                   |           |               |            |     |     |       |           |               |            |     |     |       |           |               |            |     |     |       |           |               |            |     |     |       |           |               |            |     |     |       |          |               |            |     |      |       |     |               |            |     |     |       |           |               |            |     |     |       |           |               |            |     |     |       |           |
| ABP73636.1                                                                                    | SalS         |            |                   |                   |                                                                                                                                                                                                                                                                                                                                                                                                                                                                                                                                                                                                                                                                                                                                                                                                                                                                                                                                                                                                                                                                                                                                                                                                                                                                                                                                                                                                                                                                                                                                                                                                                                                                                                                                                                                                                                                                                                                                                                                                                                                                                                                                                                                                                                                                                                                                                                                                                                                                                                                                                                                                                                                                                                                                                                                                                                                                                                                                                                                                                                                                                                                                                                                                                                                                                                                                                                                                                                                                                                                                                                                                                                                                                                                                                                                                                                                                                                                                                                                                                                                                                                                                        |      |            |            |      |            |      |            |      |            |        |            |      |            |        |            |      |            |      |            |      |            |      |            |      |            |      |            |      |            |      |            |      |            |      |            |      |            |      |            |      |            |      |            |      |            |              |            |             |            |         |               |            |     |     |                   |           |               |            |     |      |       |     |               |            |     |     |       |     |               |            |     |     |       |           |               |            |     |     |       |          |               |            |     |     |                   |           |               |            |     |      |       |     |               |            |     |      |       |     |               |            |    |      |       |     |               |            |     |     |                   |           |               |            |     |     |       |           |               |            |     |     |       |           |               |            |     |     |       |           |               |            |     |     |       |           |               |            |     |     |       |          |               |            |     |      |       |     |               |            |     |     |       |           |               |            |     |     |       |           |               |            |     |     |       |           |
| ABP73637.1                                                                                    | SalRll       |            |                   |                   |                                                                                                                                                                                                                                                                                                                                                                                                                                                                                                                                                                                                                                                                                                                                                                                                                                                                                                                                                                                                                                                                                                                                                                                                                                                                                                                                                                                                                                                                                                                                                                                                                                                                                                                                                                                                                                                                                                                                                                                                                                                                                                                                                                                                                                                                                                                                                                                                                                                                                                                                                                                                                                                                                                                                                                                                                                                                                                                                                                                                                                                                                                                                                                                                                                                                                                                                                                                                                                                                                                                                                                                                                                                                                                                                                                                                                                                                                                                                                                                                                                                                                                                                        |      |            |            |      |            |      |            |      |            |        |            |      |            |        |            |      |            |      |            |      |            |      |            |      |            |      |            |      |            |      |            |      |            |      |            |      |            |      |            |      |            |      |            |      |            |              |            |             |            |         |               |            |     |     |                   |           |               |            |     |      |       |     |               |            |     |     |       |     |               |            |     |     |       |           |               |            |     |     |       |          |               |            |     |     |                   |           |               |            |     |      |       |     |               |            |     |      |       |     |               |            |    |      |       |     |               |            |     |     |                   |           |               |            |     |     |       |           |               |            |     |     |       |           |               |            |     |     |       |           |               |            |     |     |       |           |               |            |     |     |       |          |               |            |     |      |       |     |               |            |     |     |       |           |               |            |     |     |       |           |               |            |     |     |       |           |
| ABP73638.1                                                                                    | SalQ         |            |                   |                   |                                                                                                                                                                                                                                                                                                                                                                                                                                                                                                                                                                                                                                                                                                                                                                                                                                                                                                                                                                                                                                                                                                                                                                                                                                                                                                                                                                                                                                                                                                                                                                                                                                                                                                                                                                                                                                                                                                                                                                                                                                                                                                                                                                                                                                                                                                                                                                                                                                                                                                                                                                                                                                                                                                                                                                                                                                                                                                                                                                                                                                                                                                                                                                                                                                                                                                                                                                                                                                                                                                                                                                                                                                                                                                                                                                                                                                                                                                                                                                                                                                                                                                                                        |      |            |            |      |            |      |            |      |            |        |            |      |            |        |            |      |            |      |            |      |            |      |            |      |            |      |            |      |            |      |            |      |            |      |            |      |            |      |            |      |            |      |            |      |            |              |            |             |            |         |               |            |     |     |                   |           |               |            |     |      |       |     |               |            |     |     |       |     |               |            |     |     |       |           |               |            |     |     |       |          |               |            |     |     |                   |           |               |            |     |      |       |     |               |            |     |      |       |     |               |            |    |      |       |     |               |            |     |     |                   |           |               |            |     |     |       |           |               |            |     |     |       |           |               |            |     |     |       |           |               |            |     |     |       |           |               |            |     |     |       |          |               |            |     |      |       |     |               |            |     |     |       |           |               |            |     |     |       |           |               |            |     |     |       |           |
| ABP73639.1                                                                                    | SalRll       |            |                   |                   |                                                                                                                                                                                                                                                                                                                                                                                                                                                                                                                                                                                                                                                                                                                                                                                                                                                                                                                                                                                                                                                                                                                                                                                                                                                                                                                                                                                                                                                                                                                                                                                                                                                                                                                                                                                                                                                                                                                                                                                                                                                                                                                                                                                                                                                                                                                                                                                                                                                                                                                                                                                                                                                                                                                                                                                                                                                                                                                                                                                                                                                                                                                                                                                                                                                                                                                                                                                                                                                                                                                                                                                                                                                                                                                                                                                                                                                                                                                                                                                                                                                                                                                                        |      |            |            |      |            |      |            |      |            |        |            |      |            |        |            |      |            |      |            |      |            |      |            |      |            |      |            |      |            |      |            |      |            |      |            |      |            |      |            |      |            |      |            |      |            |              |            |             |            |         |               |            |     |     |                   |           |               |            |     |      |       |     |               |            |     |     |       |     |               |            |     |     |       |           |               |            |     |     |       |          |               |            |     |     |                   |           |               |            |     |      |       |     |               |            |     |      |       |     |               |            |    |      |       |     |               |            |     |     |                   |           |               |            |     |     |       |           |               |            |     |     |       |           |               |            |     |     |       |           |               |            |     |     |       |           |               |            |     |     |       |          |               |            |     |      |       |     |               |            |     |     |       |           |               |            |     |     |       |           |               |            |     |     |       |           |
| ABP73640.1                                                                                    | SalO         |            |                   |                   |                                                                                                                                                                                                                                                                                                                                                                                                                                                                                                                                                                                                                                                                                                                                                                                                                                                                                                                                                                                                                                                                                                                                                                                                                                                                                                                                                                                                                                                                                                                                                                                                                                                                                                                                                                                                                                                                                                                                                                                                                                                                                                                                                                                                                                                                                                                                                                                                                                                                                                                                                                                                                                                                                                                                                                                                                                                                                                                                                                                                                                                                                                                                                                                                                                                                                                                                                                                                                                                                                                                                                                                                                                                                                                                                                                                                                                                                                                                                                                                                                                                                                                                                        |      |            |            |      |            |      |            |      |            |        |            |      |            |        |            |      |            |      |            |      |            |      |            |      |            |      |            |      |            |      |            |      |            |      |            |      |            |      |            |      |            |      |            |      |            |              |            |             |            |         |               |            |     |     |                   |           |               |            |     |      |       |     |               |            |     |     |       |     |               |            |     |     |       |           |               |            |     |     |       |          |               |            |     |     |                   |           |               |            |     |      |       |     |               |            |     |      |       |     |               |            |    |      |       |     |               |            |     |     |                   |           |               |            |     |     |       |           |               |            |     |     |       |           |               |            |     |     |       |           |               |            |     |     |       |           |               |            |     |     |       |          |               |            |     |      |       |     |               |            |     |     |       |           |               |            |     |     |       |           |               |            |     |     |       |           |
| ABP73641.1                                                                                    | SalN         |            |                   |                   |                                                                                                                                                                                                                                                                                                                                                                                                                                                                                                                                                                                                                                                                                                                                                                                                                                                                                                                                                                                                                                                                                                                                                                                                                                                                                                                                                                                                                                                                                                                                                                                                                                                                                                                                                                                                                                                                                                                                                                                                                                                                                                                                                                                                                                                                                                                                                                                                                                                                                                                                                                                                                                                                                                                                                                                                                                                                                                                                                                                                                                                                                                                                                                                                                                                                                                                                                                                                                                                                                                                                                                                                                                                                                                                                                                                                                                                                                                                                                                                                                                                                                                                                        |      |            |            |      |            |      |            |      |            |        |            |      |            |        |            |      |            |      |            |      |            |      |            |      |            |      |            |      |            |      |            |      |            |      |            |      |            |      |            |      |            |      |            |      |            |              |            |             |            |         |               |            |     |     |                   |           |               |            |     |      |       |     |               |            |     |     |       |     |               |            |     |     |       |           |               |            |     |     |       |          |               |            |     |     |                   |           |               |            |     |      |       |     |               |            |     |      |       |     |               |            |    |      |       |     |               |            |     |     |                   |           |               |            |     |     |       |           |               |            |     |     |       |           |               |            |     |     |       |           |               |            |     |     |       |           |               |            |     |     |       |          |               |            |     |      |       |     |               |            |     |     |       |           |               |            |     |     |       |           |               |            |     |     |       |           |
| ABP73642.1                                                                                    | SalM         |            |                   |                   |                                                                                                                                                                                                                                                                                                                                                                                                                                                                                                                                                                                                                                                                                                                                                                                                                                                                                                                                                                                                                                                                                                                                                                                                                                                                                                                                                                                                                                                                                                                                                                                                                                                                                                                                                                                                                                                                                                                                                                                                                                                                                                                                                                                                                                                                                                                                                                                                                                                                                                                                                                                                                                                                                                                                                                                                                                                                                                                                                                                                                                                                                                                                                                                                                                                                                                                                                                                                                                                                                                                                                                                                                                                                                                                                                                                                                                                                                                                                                                                                                                                                                                                                        |      |            |            |      |            |      |            |      |            |        |            |      |            |        |            |      |            |      |            |      |            |      |            |      |            |      |            |      |            |      |            |      |            |      |            |      |            |      |            |      |            |      |            |      |            |              |            |             |            |         |               |            |     |     |                   |           |               |            |     |      |       |     |               |            |     |     |       |     |               |            |     |     |       |           |               |            |     |     |       |          |               |            |     |     |                   |           |               |            |     |      |       |     |               |            |     |      |       |     |               |            |    |      |       |     |               |            |     |     |                   |           |               |            |     |     |       |           |               |            |     |     |       |           |               |            |     |     |       |           |               |            |     |     |       |           |               |            |     |     |       |          |               |            |     |      |       |     |               |            |     |     |       |           |               |            |     |     |       |           |               |            |     |     |       |           |
| ABP73643.1                                                                                    | SalL         |            |                   |                   |                                                                                                                                                                                                                                                                                                                                                                                                                                                                                                                                                                                                                                                                                                                                                                                                                                                                                                                                                                                                                                                                                                                                                                                                                                                                                                                                                                                                                                                                                                                                                                                                                                                                                                                                                                                                                                                                                                                                                                                                                                                                                                                                                                                                                                                                                                                                                                                                                                                                                                                                                                                                                                                                                                                                                                                                                                                                                                                                                                                                                                                                                                                                                                                                                                                                                                                                                                                                                                                                                                                                                                                                                                                                                                                                                                                                                                                                                                                                                                                                                                                                                                                                        |      |            |            |      |            |      |            |      |            |        |            |      |            |        |            |      |            |      |            |      |            |      |            |      |            |      |            |      |            |      |            |      |            |      |            |      |            |      |            |      |            |      |            |      |            |              |            |             |            |         |               |            |     |     |                   |           |               |            |     |      |       |     |               |            |     |     |       |     |               |            |     |     |       |           |               |            |     |     |       |          |               |            |     |     |                   |           |               |            |     |      |       |     |               |            |     |      |       |     |               |            |    |      |       |     |               |            |     |     |                   |           |               |            |     |     |       |           |               |            |     |     |       |           |               |            |     |     |       |           |               |            |     |     |       |           |               |            |     |     |       |          |               |            |     |      |       |     |               |            |     |     |       |           |               |            |     |     |       |           |               |            |     |     |       |           |
| ABP73644.1                                                                                    | SalK         |            |                   |                   |                                                                                                                                                                                                                                                                                                                                                                                                                                                                                                                                                                                                                                                                                                                                                                                                                                                                                                                                                                                                                                                                                                                                                                                                                                                                                                                                                                                                                                                                                                                                                                                                                                                                                                                                                                                                                                                                                                                                                                                                                                                                                                                                                                                                                                                                                                                                                                                                                                                                                                                                                                                                                                                                                                                                                                                                                                                                                                                                                                                                                                                                                                                                                                                                                                                                                                                                                                                                                                                                                                                                                                                                                                                                                                                                                                                                                                                                                                                                                                                                                                                                                                                                        |      |            |            |      |            |      |            |      |            |        |            |      |            |        |            |      |            |      |            |      |            |      |            |      |            |      |            |      |            |      |            |      |            |      |            |      |            |      |            |      |            |      |            |      |            |              |            |             |            |         |               |            |     |     |                   |           |               |            |     |      |       |     |               |            |     |     |       |     |               |            |     |     |       |           |               |            |     |     |       |          |               |            |     |     |                   |           |               |            |     |      |       |     |               |            |     |      |       |     |               |            |    |      |       |     |               |            |     |     |                   |           |               |            |     |     |       |           |               |            |     |     |       |           |               |            |     |     |       |           |               |            |     |     |       |           |               |            |     |     |       |          |               |            |     |      |       |     |               |            |     |     |       |           |               |            |     |     |       |           |               |            |     |     |       |           |
| ABP73645.1                                                                                    | SalA         |            |                   |                   |                                                                                                                                                                                                                                                                                                                                                                                                                                                                                                                                                                                                                                                                                                                                                                                                                                                                                                                                                                                                                                                                                                                                                                                                                                                                                                                                                                                                                                                                                                                                                                                                                                                                                                                                                                                                                                                                                                                                                                                                                                                                                                                                                                                                                                                                                                                                                                                                                                                                                                                                                                                                                                                                                                                                                                                                                                                                                                                                                                                                                                                                                                                                                                                                                                                                                                                                                                                                                                                                                                                                                                                                                                                                                                                                                                                                                                                                                                                                                                                                                                                                                                                                        |      |            |            |      |            |      |            |      |            |        |            |      |            |        |            |      |            |      |            |      |            |      |            |      |            |      |            |      |            |      |            |      |            |      |            |      |            |      |            |      |            |      |            |      |            |              |            |             |            |         |               |            |     |     |                   |           |               |            |     |      |       |     |               |            |     |     |       |     |               |            |     |     |       |           |               |            |     |     |       |          |               |            |     |     |                   |           |               |            |     |      |       |     |               |            |     |      |       |     |               |            |    |      |       |     |               |            |     |     |                   |           |               |            |     |     |       |           |               |            |     |     |       |           |               |            |     |     |       |           |               |            |     |     |       |           |               |            |     |     |       |          |               |            |     |      |       |     |               |            |     |     |       |           |               |            |     |     |       |           |               |            |     |     |       |           |
| ABP73646.1                                                                                    | SalB         |            |                   |                   |                                                                                                                                                                                                                                                                                                                                                                                                                                                                                                                                                                                                                                                                                                                                                                                                                                                                                                                                                                                                                                                                                                                                                                                                                                                                                                                                                                                                                                                                                                                                                                                                                                                                                                                                                                                                                                                                                                                                                                                                                                                                                                                                                                                                                                                                                                                                                                                                                                                                                                                                                                                                                                                                                                                                                                                                                                                                                                                                                                                                                                                                                                                                                                                                                                                                                                                                                                                                                                                                                                                                                                                                                                                                                                                                                                                                                                                                                                                                                                                                                                                                                                                                        |      |            |            |      |            |      |            |      |            |        |            |      |            |        |            |      |            |      |            |      |            |      |            |      |            |      |            |      |            |      |            |      |            |      |            |      |            |      |            |      |            |      |            |      |            |              |            |             |            |         |               |            |     |     |                   |           |               |            |     |      |       |     |               |            |     |     |       |     |               |            |     |     |       |           |               |            |     |     |       |          |               |            |     |     |                   |           |               |            |     |      |       |     |               |            |     |      |       |     |               |            |    |      |       |     |               |            |     |     |                   |           |               |            |     |     |       |           |               |            |     |     |       |           |               |            |     |     |       |           |               |            |     |     |       |           |               |            |     |     |       |          |               |            |     |      |       |     |               |            |     |     |       |           |               |            |     |     |       |           |               |            |     |     |       |           |
| ABP73647.1                                                                                    | SalC         |            |                   |                   |                                                                                                                                                                                                                                                                                                                                                                                                                                                                                                                                                                                                                                                                                                                                                                                                                                                                                                                                                                                                                                                                                                                                                                                                                                                                                                                                                                                                                                                                                                                                                                                                                                                                                                                                                                                                                                                                                                                                                                                                                                                                                                                                                                                                                                                                                                                                                                                                                                                                                                                                                                                                                                                                                                                                                                                                                                                                                                                                                                                                                                                                                                                                                                                                                                                                                                                                                                                                                                                                                                                                                                                                                                                                                                                                                                                                                                                                                                                                                                                                                                                                                                                                        |      |            |            |      |            |      |            |      |            |        |            |      |            |        |            |      |            |      |            |      |            |      |            |      |            |      |            |      |            |      |            |      |            |      |            |      |            |      |            |      |            |      |            |      |            |              |            |             |            |         |               |            |     |     |                   |           |               |            |     |      |       |     |               |            |     |     |       |     |               |            |     |     |       |           |               |            |     |     |       |          |               |            |     |     |                   |           |               |            |     |      |       |     |               |            |     |      |       |     |               |            |    |      |       |     |               |            |     |     |                   |           |               |            |     |     |       |           |               |            |     |     |       |           |               |            |     |     |       |           |               |            |     |     |       |           |               |            |     |     |       |          |               |            |     |      |       |     |               |            |     |     |       |           |               |            |     |     |       |           |               |            |     |     |       |           |
| ABP73648.1                                                                                    | SalD         |            |                   |                   |                                                                                                                                                                                                                                                                                                                                                                                                                                                                                                                                                                                                                                                                                                                                                                                                                                                                                                                                                                                                                                                                                                                                                                                                                                                                                                                                                                                                                                                                                                                                                                                                                                                                                                                                                                                                                                                                                                                                                                                                                                                                                                                                                                                                                                                                                                                                                                                                                                                                                                                                                                                                                                                                                                                                                                                                                                                                                                                                                                                                                                                                                                                                                                                                                                                                                                                                                                                                                                                                                                                                                                                                                                                                                                                                                                                                                                                                                                                                                                                                                                                                                                                                        |      |            |            |      |            |      |            |      |            |        |            |      |            |        |            |      |            |      |            |      |            |      |            |      |            |      |            |      |            |      |            |      |            |      |            |      |            |      |            |      |            |      |            |      |            |              |            |             |            |         |               |            |     |     |                   |           |               |            |     |      |       |     |               |            |     |     |       |     |               |            |     |     |       |           |               |            |     |     |       |          |               |            |     |     |                   |           |               |            |     |      |       |     |               |            |     |      |       |     |               |            |    |      |       |     |               |            |     |     |                   |           |               |            |     |     |       |           |               |            |     |     |       |           |               |            |     |     |       |           |               |            |     |     |       |           |               |            |     |     |       |          |               |            |     |      |       |     |               |            |     |     |       |           |               |            |     |     |       |           |               |            |     |     |       |           |
| ABP73649.1                                                                                    | SalE         |            |                   |                   |                                                                                                                                                                                                                                                                                                                                                                                                                                                                                                                                                                                                                                                                                                                                                                                                                                                                                                                                                                                                                                                                                                                                                                                                                                                                                                                                                                                                                                                                                                                                                                                                                                                                                                                                                                                                                                                                                                                                                                                                                                                                                                                                                                                                                                                                                                                                                                                                                                                                                                                                                                                                                                                                                                                                                                                                                                                                                                                                                                                                                                                                                                                                                                                                                                                                                                                                                                                                                                                                                                                                                                                                                                                                                                                                                                                                                                                                                                                                                                                                                                                                                                                                        |      |            |            |      |            |      |            |      |            |        |            |      |            |        |            |      |            |      |            |      |            |      |            |      |            |      |            |      |            |      |            |      |            |      |            |      |            |      |            |      |            |      |            |      |            |              |            |             |            |         |               |            |     |     |                   |           |               |            |     |      |       |     |               |            |     |     |       |     |               |            |     |     |       |           |               |            |     |     |       |          |               |            |     |     |                   |           |               |            |     |      |       |     |               |            |     |      |       |     |               |            |    |      |       |     |               |            |     |     |                   |           |               |            |     |     |       |           |               |            |     |     |       |           |               |            |     |     |       |           |               |            |     |     |       |           |               |            |     |     |       |          |               |            |     |      |       |     |               |            |     |     |       |           |               |            |     |     |       |           |               |            |     |     |       |           |
| ABP73650.1                                                                                    | SalF         |            |                   |                   |                                                                                                                                                                                                                                                                                                                                                                                                                                                                                                                                                                                                                                                                                                                                                                                                                                                                                                                                                                                                                                                                                                                                                                                                                                                                                                                                                                                                                                                                                                                                                                                                                                                                                                                                                                                                                                                                                                                                                                                                                                                                                                                                                                                                                                                                                                                                                                                                                                                                                                                                                                                                                                                                                                                                                                                                                                                                                                                                                                                                                                                                                                                                                                                                                                                                                                                                                                                                                                                                                                                                                                                                                                                                                                                                                                                                                                                                                                                                                                                                                                                                                                                                        |      |            |            |      |            |      |            |      |            |        |            |      |            |        |            |      |            |      |            |      |            |      |            |      |            |      |            |      |            |      |            |      |            |      |            |      |            |      |            |      |            |      |            |      |            |              |            |             |            |         |               |            |     |     |                   |           |               |            |     |      |       |     |               |            |     |     |       |     |               |            |     |     |       |           |               |            |     |     |       |          |               |            |     |     |                   |           |               |            |     |      |       |     |               |            |     |      |       |     |               |            |    |      |       |     |               |            |     |     |                   |           |               |            |     |     |       |           |               |            |     |     |       |           |               |            |     |     |       |           |               |            |     |     |       |           |               |            |     |     |       |          |               |            |     |      |       |     |               |            |     |     |       |           |               |            |     |     |       |           |               |            |     |     |       |           |
| ABP73651.1                                                                                    | SalG         |            |                   |                   |                                                                                                                                                                                                                                                                                                                                                                                                                                                                                                                                                                                                                                                                                                                                                                                                                                                                                                                                                                                                                                                                                                                                                                                                                                                                                                                                                                                                                                                                                                                                                                                                                                                                                                                                                                                                                                                                                                                                                                                                                                                                                                                                                                                                                                                                                                                                                                                                                                                                                                                                                                                                                                                                                                                                                                                                                                                                                                                                                                                                                                                                                                                                                                                                                                                                                                                                                                                                                                                                                                                                                                                                                                                                                                                                                                                                                                                                                                                                                                                                                                                                                                                                        |      |            |            |      |            |      |            |      |            |        |            |      |            |        |            |      |            |      |            |      |            |      |            |      |            |      |            |      |            |      |            |      |            |      |            |      |            |      |            |      |            |      |            |      |            |              |            |             |            |         |               |            |     |     |                   |           |               |            |     |      |       |     |               |            |     |     |       |     |               |            |     |     |       |           |               |            |     |     |       |          |               |            |     |     |                   |           |               |            |     |      |       |     |               |            |     |      |       |     |               |            |    |      |       |     |               |            |     |     |                   |           |               |            |     |     |       |           |               |            |     |     |       |           |               |            |     |     |       |           |               |            |     |     |       |           |               |            |     |     |       |          |               |            |     |      |       |     |               |            |     |     |       |           |               |            |     |     |       |           |               |            |     |     |       |           |
| ABP73652.1                                                                                    | SalH         |            |                   |                   |                                                                                                                                                                                                                                                                                                                                                                                                                                                                                                                                                                                                                                                                                                                                                                                                                                                                                                                                                                                                                                                                                                                                                                                                                                                                                                                                                                                                                                                                                                                                                                                                                                                                                                                                                                                                                                                                                                                                                                                                                                                                                                                                                                                                                                                                                                                                                                                                                                                                                                                                                                                                                                                                                                                                                                                                                                                                                                                                                                                                                                                                                                                                                                                                                                                                                                                                                                                                                                                                                                                                                                                                                                                                                                                                                                                                                                                                                                                                                                                                                                                                                                                                        |      |            |            |      |            |      |            |      |            |        |            |      |            |        |            |      |            |      |            |      |            |      |            |      |            |      |            |      |            |      |            |      |            |      |            |      |            |      |            |      |            |      |            |      |            |              |            |             |            |         |               |            |     |     |                   |           |               |            |     |      |       |     |               |            |     |     |       |     |               |            |     |     |       |           |               |            |     |     |       |          |               |            |     |     |                   |           |               |            |     |      |       |     |               |            |     |      |       |     |               |            |    |      |       |     |               |            |     |     |                   |           |               |            |     |     |       |           |               |            |     |     |       |           |               |            |     |     |       |           |               |            |     |     |       |           |               |            |     |     |       |          |               |            |     |      |       |     |               |            |     |     |       |           |               |            |     |     |       |           |               |            |     |     |       |           |
| ABP73653.1                                                                                    | SalI         |            |                   |                   |                                                                                                                                                                                                                                                                                                                                                                                                                                                                                                                                                                                                                                                                                                                                                                                                                                                                                                                                                                                                                                                                                                                                                                                                                                                                                                                                                                                                                                                                                                                                                                                                                                                                                                                                                                                                                                                                                                                                                                                                                                                                                                                                                                                                                                                                                                                                                                                                                                                                                                                                                                                                                                                                                                                                                                                                                                                                                                                                                                                                                                                                                                                                                                                                                                                                                                                                                                                                                                                                                                                                                                                                                                                                                                                                                                                                                                                                                                                                                                                                                                                                                                                                        |      |            |            |      |            |      |            |      |            |        |            |      |            |        |            |      |            |      |            |      |            |      |            |      |            |      |            |      |            |      |            |      |            |      |            |      |            |      |            |      |            |      |            |      |            |              |            |             |            |         |               |            |     |     |                   |           |               |            |     |      |       |     |               |            |     |     |       |     |               |            |     |     |       |           |               |            |     |     |       |          |               |            |     |     |                   |           |               |            |     |      |       |     |               |            |     |      |       |     |               |            |    |      |       |     |               |            |     |     |                   |           |               |            |     |     |       |           |               |            |     |     |       |           |               |            |     |     |       |           |               |            |     |     |       |           |               |            |     |     |       |          |               |            |     |      |       |     |               |            |     |     |       |           |               |            |     |     |       |           |               |            |     |     |       |           |
| ABP73654.1                                                                                    | SalJ         |            |                   |                   |                                                                                                                                                                                                                                                                                                                                                                                                                                                                                                                                                                                                                                                                                                                                                                                                                                                                                                                                                                                                                                                                                                                                                                                                                                                                                                                                                                                                                                                                                                                                                                                                                                                                                                                                                                                                                                                                                                                                                                                                                                                                                                                                                                                                                                                                                                                                                                                                                                                                                                                                                                                                                                                                                                                                                                                                                                                                                                                                                                                                                                                                                                                                                                                                                                                                                                                                                                                                                                                                                                                                                                                                                                                                                                                                                                                                                                                                                                                                                                                                                                                                                                                                        |      |            |            |      |            |      |            |      |            |        |            |      |            |        |            |      |            |      |            |      |            |      |            |      |            |      |            |      |            |      |            |      |            |      |            |      |            |      |            |      |            |      |            |      |            |              |            |             |            |         |               |            |     |     |                   |           |               |            |     |      |       |     |               |            |     |     |       |     |               |            |     |     |       |           |               |            |     |     |       |          |               |            |     |     |                   |           |               |            |     |      |       |     |               |            |     |      |       |     |               |            |    |      |       |     |               |            |     |     |                   |           |               |            |     |     |       |           |               |            |     |     |       |           |               |            |     |     |       |           |               |            |     |     |       |           |               |            |     |     |       |          |               |            |     |      |       |     |               |            |     |     |       |           |               |            |     |     |       |           |               |            |     |     |       |           |
| Query Gene                                                                                    | Subject Gene | % Identity | Blast Score       | % Coverage        | E-value                                                                                                                                                                                                                                                                                                                                                                                                                                                                                                                                                                                                                                                                                                                                                                                                                                                                                                                                                                                                                                                                                                                                                                                                                                                                                                                                                                                                                                                                                                                                                                                                                                                                                                                                                                                                                                                                                                                                                                                                                                                                                                                                                                                                                                                                                                                                                                                                                                                                                                                                                                                                                                                                                                                                                                                                                                                                                                                                                                                                                                                                                                                                                                                                                                                                                                                                                                                                                                                                                                                                                                                                                                                                                                                                                                                                                                                                                                                                                                                                                                                                                                                                |      |            |            |      |            |      |            |      |            |        |            |      |            |        |            |      |            |      |            |      |            |      |            |      |            |      |            |      |            |      |            |      |            |      |            |      |            |      |            |      |            |      |            |      |            |              |            |             |            |         |               |            |     |     |                   |           |               |            |     |      |       |     |               |            |     |     |       |     |               |            |     |     |       |           |               |            |     |     |       |          |               |            |     |     |                   |           |               |            |     |      |       |     |               |            |     |      |       |     |               |            |    |      |       |     |               |            |     |     |                   |           |               |            |     |     |       |           |               |            |     |     |       |           |               |            |     |     |       |           |               |            |     |     |       |           |               |            |     |     |       |          |               |            |     |      |       |     |               |            |     |     |       |           |               |            |     |     |       |           |               |            |     |     |       |           |
| STROP_RS05145                                                                                 | ABP73653.1   | 100        | 531               | 98.58156028368793 | 1.47e-193                                                                                                                                                                                                                                                                                                                                                                                                                                                                                                                                                                                                                                                                                                                                                                                                                                                                                                                                                                                                                                                                                                                                                                                                                                                                                                                                                                                                                                                                                                                                                                                                                                                                                                                                                                                                                                                                                                                                                                                                                                                                                                                                                                                                                                                                                                                                                                                                                                                                                                                                                                                                                                                                                                                                                                                                                                                                                                                                                                                                                                                                                                                                                                                                                                                                                                                                                                                                                                                                                                                                                                                                                                                                                                                                                                                                                                                                                                                                                                                                                                                                                                                              |      |            |            |      |            |      |            |      |            |        |            |      |            |        |            |      |            |      |            |      |            |      |            |      |            |      |            |      |            |      |            |      |            |      |            |      |            |      |            |      |            |      |            |      |            |              |            |             |            |         |               |            |     |     |                   |           |               |            |     |      |       |     |               |            |     |     |       |     |               |            |     |     |       |           |               |            |     |     |       |          |               |            |     |     |                   |           |               |            |     |      |       |     |               |            |     |      |       |     |               |            |    |      |       |     |               |            |     |     |                   |           |               |            |     |     |       |           |               |            |     |     |       |           |               |            |     |     |       |           |               |            |     |     |       |           |               |            |     |     |       |          |               |            |     |      |       |     |               |            |     |     |       |           |               |            |     |     |       |           |               |            |     |     |       |           |
| STROP_RS05150                                                                                 | ABP73652.1   | 100        | 1148              | 100.0             | 0.0                                                                                                                                                                                                                                                                                                                                                                                                                                                                                                                                                                                                                                                                                                                                                                                                                                                                                                                                                                                                                                                                                                                                                                                                                                                                                                                                                                                                                                                                                                                                                                                                                                                                                                                                                                                                                                                                                                                                                                                                                                                                                                                                                                                                                                                                                                                                                                                                                                                                                                                                                                                                                                                                                                                                                                                                                                                                                                                                                                                                                                                                                                                                                                                                                                                                                                                                                                                                                                                                                                                                                                                                                                                                                                                                                                                                                                                                                                                                                                                                                                                                                                                                    |      |            |            |      |            |      |            |      |            |        |            |      |            |        |            |      |            |      |            |      |            |      |            |      |            |      |            |      |            |      |            |      |            |      |            |      |            |      |            |      |            |      |            |      |            |              |            |             |            |         |               |            |     |     |                   |           |               |            |     |      |       |     |               |            |     |     |       |     |               |            |     |     |       |           |               |            |     |     |       |          |               |            |     |     |                   |           |               |            |     |      |       |     |               |            |     |      |       |     |               |            |    |      |       |     |               |            |     |     |                   |           |               |            |     |     |       |           |               |            |     |     |       |           |               |            |     |     |       |           |               |            |     |     |       |           |               |            |     |     |       |          |               |            |     |      |       |     |               |            |     |     |       |           |               |            |     |     |       |           |               |            |     |     |       |           |
| STROP_RS05155                                                                                 | ABP73651.1   | 100        | 927               | 100.0             | 0.0                                                                                                                                                                                                                                                                                                                                                                                                                                                                                                                                                                                                                                                                                                                                                                                                                                                                                                                                                                                                                                                                                                                                                                                                                                                                                                                                                                                                                                                                                                                                                                                                                                                                                                                                                                                                                                                                                                                                                                                                                                                                                                                                                                                                                                                                                                                                                                                                                                                                                                                                                                                                                                                                                                                                                                                                                                                                                                                                                                                                                                                                                                                                                                                                                                                                                                                                                                                                                                                                                                                                                                                                                                                                                                                                                                                                                                                                                                                                                                                                                                                                                                                                    |      |            |            |      |            |      |            |      |            |        |            |      |            |        |            |      |            |      |            |      |            |      |            |      |            |      |            |      |            |      |            |      |            |      |            |      |            |      |            |      |            |      |            |      |            |              |            |             |            |         |               |            |     |     |                   |           |               |            |     |      |       |     |               |            |     |     |       |     |               |            |     |     |       |           |               |            |     |     |       |          |               |            |     |     |                   |           |               |            |     |      |       |     |               |            |     |      |       |     |               |            |    |      |       |     |               |            |     |     |                   |           |               |            |     |     |       |           |               |            |     |     |       |           |               |            |     |     |       |           |               |            |     |     |       |           |               |            |     |     |       |          |               |            |     |      |       |     |               |            |     |     |       |           |               |            |     |     |       |           |               |            |     |     |       |           |
| STROP_RS05160                                                                                 | ABP73650.1   | 100        | 578               | 100.0             | 5.85e-212                                                                                                                                                                                                                                                                                                                                                                                                                                                                                                                                                                                                                                                                                                                                                                                                                                                                                                                                                                                                                                                                                                                                                                                                                                                                                                                                                                                                                                                                                                                                                                                                                                                                                                                                                                                                                                                                                                                                                                                                                                                                                                                                                                                                                                                                                                                                                                                                                                                                                                                                                                                                                                                                                                                                                                                                                                                                                                                                                                                                                                                                                                                                                                                                                                                                                                                                                                                                                                                                                                                                                                                                                                                                                                                                                                                                                                                                                                                                                                                                                                                                                                                              |      |            |            |      |            |      |            |      |            |        |            |      |            |        |            |      |            |      |            |      |            |      |            |      |            |      |            |      |            |      |            |      |            |      |            |      |            |      |            |      |            |      |            |      |            |              |            |             |            |         |               |            |     |     |                   |           |               |            |     |      |       |     |               |            |     |     |       |     |               |            |     |     |       |           |               |            |     |     |       |          |               |            |     |     |                   |           |               |            |     |      |       |     |               |            |     |      |       |     |               |            |    |      |       |     |               |            |     |     |                   |           |               |            |     |     |       |           |               |            |     |     |       |           |               |            |     |     |       |           |               |            |     |     |       |           |               |            |     |     |       |          |               |            |     |      |       |     |               |            |     |     |       |           |               |            |     |     |       |           |               |            |     |     |       |           |
| STROP_RS05165                                                                                 | ABP73649.1   | 100        | 160               | 100.0             | 1.53e-53                                                                                                                                                                                                                                                                                                                                                                                                                                                                                                                                                                                                                                                                                                                                                                                                                                                                                                                                                                                                                                                                                                                                                                                                                                                                                                                                                                                                                                                                                                                                                                                                                                                                                                                                                                                                                                                                                                                                                                                                                                                                                                                                                                                                                                                                                                                                                                                                                                                                                                                                                                                                                                                                                                                                                                                                                                                                                                                                                                                                                                                                                                                                                                                                                                                                                                                                                                                                                                                                                                                                                                                                                                                                                                                                                                                                                                                                                                                                                                                                                                                                                                                               |      |            |            |      |            |      |            |      |            |        |            |      |            |        |            |      |            |      |            |      |            |      |            |      |            |      |            |      |            |      |            |      |            |      |            |      |            |      |            |      |            |      |            |      |            |              |            |             |            |         |               |            |     |     |                   |           |               |            |     |      |       |     |               |            |     |     |       |     |               |            |     |     |       |           |               |            |     |     |       |          |               |            |     |     |                   |           |               |            |     |      |       |     |               |            |     |      |       |     |               |            |    |      |       |     |               |            |     |     |                   |           |               |            |     |     |       |           |               |            |     |     |       |           |               |            |     |     |       |           |               |            |     |     |       |           |               |            |     |     |       |          |               |            |     |      |       |     |               |            |     |     |       |           |               |            |     |     |       |           |               |            |     |     |       |           |
| STROP_RS05170                                                                                 | ABP73648.1   | 100        | 840               | 96.11764705882354 | 6.95e-311                                                                                                                                                                                                                                                                                                                                                                                                                                                                                                                                                                                                                                                                                                                                                                                                                                                                                                                                                                                                                                                                                                                                                                                                                                                                                                                                                                                                                                                                                                                                                                                                                                                                                                                                                                                                                                                                                                                                                                                                                                                                                                                                                                                                                                                                                                                                                                                                                                                                                                                                                                                                                                                                                                                                                                                                                                                                                                                                                                                                                                                                                                                                                                                                                                                                                                                                                                                                                                                                                                                                                                                                                                                                                                                                                                                                                                                                                                                                                                                                                                                                                                                              |      |            |            |      |            |      |            |      |            |        |            |      |            |        |            |      |            |      |            |      |            |      |            |      |            |      |            |      |            |      |            |      |            |      |            |      |            |      |            |      |            |      |            |      |            |              |            |             |            |         |               |            |     |     |                   |           |               |            |     |      |       |     |               |            |     |     |       |     |               |            |     |     |       |           |               |            |     |     |       |          |               |            |     |     |                   |           |               |            |     |      |       |     |               |            |     |      |       |     |               |            |    |      |       |     |               |            |     |     |                   |           |               |            |     |     |       |           |               |            |     |     |       |           |               |            |     |     |       |           |               |            |     |     |       |           |               |            |     |     |       |          |               |            |     |      |       |     |               |            |     |     |       |           |               |            |     |     |       |           |               |            |     |     |       |           |
| STROP_RS05175                                                                                 | ABP73647.1   | 100        | 1198              | 100.0             | 0.0                                                                                                                                                                                                                                                                                                                                                                                                                                                                                                                                                                                                                                                                                                                                                                                                                                                                                                                                                                                                                                                                                                                                                                                                                                                                                                                                                                                                                                                                                                                                                                                                                                                                                                                                                                                                                                                                                                                                                                                                                                                                                                                                                                                                                                                                                                                                                                                                                                                                                                                                                                                                                                                                                                                                                                                                                                                                                                                                                                                                                                                                                                                                                                                                                                                                                                                                                                                                                                                                                                                                                                                                                                                                                                                                                                                                                                                                                                                                                                                                                                                                                                                                    |      |            |            |      |            |      |            |      |            |        |            |      |            |        |            |      |            |      |            |      |            |      |            |      |            |      |            |      |            |      |            |      |            |      |            |      |            |      |            |      |            |      |            |      |            |              |            |             |            |         |               |            |     |     |                   |           |               |            |     |      |       |     |               |            |     |     |       |     |               |            |     |     |       |           |               |            |     |     |       |          |               |            |     |     |                   |           |               |            |     |      |       |     |               |            |     |      |       |     |               |            |    |      |       |     |               |            |     |     |                   |           |               |            |     |     |       |           |               |            |     |     |       |           |               |            |     |     |       |           |               |            |     |     |       |           |               |            |     |     |       |          |               |            |     |      |       |     |               |            |     |     |       |           |               |            |     |     |       |           |               |            |     |     |       |           |
| STROP_RS05180                                                                                 | ABP73646.1   | 100        | 1232              | 100.0             | 0.0                                                                                                                                                                                                                                                                                                                                                                                                                                                                                                                                                                                                                                                                                                                                                                                                                                                                                                                                                                                                                                                                                                                                                                                                                                                                                                                                                                                                                                                                                                                                                                                                                                                                                                                                                                                                                                                                                                                                                                                                                                                                                                                                                                                                                                                                                                                                                                                                                                                                                                                                                                                                                                                                                                                                                                                                                                                                                                                                                                                                                                                                                                                                                                                                                                                                                                                                                                                                                                                                                                                                                                                                                                                                                                                                                                                                                                                                                                                                                                                                                                                                                                                                    |      |            |            |      |            |      |            |      |            |        |            |      |            |        |            |      |            |      |            |      |            |      |            |      |            |      |            |      |            |      |            |      |            |      |            |      |            |      |            |      |            |      |            |      |            |              |            |             |            |         |               |            |     |     |                   |           |               |            |     |      |       |     |               |            |     |     |       |     |               |            |     |     |       |           |               |            |     |     |       |          |               |            |     |     |                   |           |               |            |     |      |       |     |               |            |     |      |       |     |               |            |    |      |       |     |               |            |     |     |                   |           |               |            |     |     |       |           |               |            |     |     |       |           |               |            |     |     |       |           |               |            |     |     |       |           |               |            |     |     |       |          |               |            |     |      |       |     |               |            |     |     |       |           |               |            |     |     |       |           |               |            |     |     |       |           |
| STROP_RS05185                                                                                 | ABP73645.1   | 99         | 3996              | 100.0             | 0.0                                                                                                                                                                                                                                                                                                                                                                                                                                                                                                                                                                                                                                                                                                                                                                                                                                                                                                                                                                                                                                                                                                                                                                                                                                                                                                                                                                                                                                                                                                                                                                                                                                                                                                                                                                                                                                                                                                                                                                                                                                                                                                                                                                                                                                                                                                                                                                                                                                                                                                                                                                                                                                                                                                                                                                                                                                                                                                                                                                                                                                                                                                                                                                                                                                                                                                                                                                                                                                                                                                                                                                                                                                                                                                                                                                                                                                                                                                                                                                                                                                                                                                                                    |      |            |            |      |            |      |            |      |            |        |            |      |            |        |            |      |            |      |            |      |            |      |            |      |            |      |            |      |            |      |            |      |            |      |            |      |            |      |            |      |            |      |            |      |            |              |            |             |            |         |               |            |     |     |                   |           |               |            |     |      |       |     |               |            |     |     |       |     |               |            |     |     |       |           |               |            |     |     |       |          |               |            |     |     |                   |           |               |            |     |      |       |     |               |            |     |      |       |     |               |            |    |      |       |     |               |            |     |     |                   |           |               |            |     |     |       |           |               |            |     |     |       |           |               |            |     |     |       |           |               |            |     |     |       |           |               |            |     |     |       |          |               |            |     |      |       |     |               |            |     |     |       |           |               |            |     |     |       |           |               |            |     |     |       |           |
| STROP_RS05190                                                                                 | ABP73644.1   | 100        | 551               | 96.89655172412794 | 2.69e-201                                                                                                                                                                                                                                                                                                                                                                                                                                                                                                                                                                                                                                                                                                                                                                                                                                                                                                                                                                                                                                                                                                                                                                                                                                                                                                                                                                                                                                                                                                                                                                                                                                                                                                                                                                                                                                                                                                                                                                                                                                                                                                                                                                                                                                                                                                                                                                                                                                                                                                                                                                                                                                                                                                                                                                                                                                                                                                                                                                                                                                                                                                                                                                                                                                                                                                                                                                                                                                                                                                                                                                                                                                                                                                                                                                                                                                                                                                                                                                                                                                                                                                                              |      |            |            |      |            |      |            |      |            |        |            |      |            |        |            |      |            |      |            |      |            |      |            |      |            |      |            |      |            |      |            |      |            |      |            |      |            |      |            |      |            |      |            |      |            |              |            |             |            |         |               |            |     |     |                   |           |               |            |     |      |       |     |               |            |     |     |       |     |               |            |     |     |       |           |               |            |     |     |       |          |               |            |     |     |                   |           |               |            |     |      |       |     |               |            |     |      |       |     |               |            |    |      |       |     |               |            |     |     |                   |           |               |            |     |     |       |           |               |            |     |     |       |           |               |            |     |     |       |           |               |            |     |     |       |           |               |            |     |     |       |          |               |            |     |      |       |     |               |            |     |     |       |           |               |            |     |     |       |           |               |            |     |     |       |           |
| STROP_RS05195                                                                                 | ABP73643.1   | 100        | 576               | 100.0             | 2.68e-211                                                                                                                                                                                                                                                                                                                                                                                                                                                                                                                                                                                                                                                                                                                                                                                                                                                                                                                                                                                                                                                                                                                                                                                                                                                                                                                                                                                                                                                                                                                                                                                                                                                                                                                                                                                                                                                                                                                                                                                                                                                                                                                                                                                                                                                                                                                                                                                                                                                                                                                                                                                                                                                                                                                                                                                                                                                                                                                                                                                                                                                                                                                                                                                                                                                                                                                                                                                                                                                                                                                                                                                                                                                                                                                                                                                                                                                                                                                                                                                                                                                                                                                              |      |            |            |      |            |      |            |      |            |        |            |      |            |        |            |      |            |      |            |      |            |      |            |      |            |      |            |      |            |      |            |      |            |      |            |      |            |      |            |      |            |      |            |      |            |              |            |             |            |         |               |            |     |     |                   |           |               |            |     |      |       |     |               |            |     |     |       |     |               |            |     |     |       |           |               |            |     |     |       |          |               |            |     |     |                   |           |               |            |     |      |       |     |               |            |     |      |       |     |               |            |    |      |       |     |               |            |     |     |                   |           |               |            |     |     |       |           |               |            |     |     |       |           |               |            |     |     |       |           |               |            |     |     |       |           |               |            |     |     |       |          |               |            |     |      |       |     |               |            |     |     |       |           |               |            |     |     |       |           |               |            |     |     |       |           |
| STROP_RS05200                                                                                 | ABP73642.1   | 100        | 497               | 100.0             | 5.51e-181                                                                                                                                                                                                                                                                                                                                                                                                                                                                                                                                                                                                                                                                                                                                                                                                                                                                                                                                                                                                                                                                                                                                                                                                                                                                                                                                                                                                                                                                                                                                                                                                                                                                                                                                                                                                                                                                                                                                                                                                                                                                                                                                                                                                                                                                                                                                                                                                                                                                                                                                                                                                                                                                                                                                                                                                                                                                                                                                                                                                                                                                                                                                                                                                                                                                                                                                                                                                                                                                                                                                                                                                                                                                                                                                                                                                                                                                                                                                                                                                                                                                                                                              |      |            |            |      |            |      |            |      |            |        |            |      |            |        |            |      |            |      |            |      |            |      |            |      |            |      |            |      |            |      |            |      |            |      |            |      |            |      |            |      |            |      |            |      |            |              |            |             |            |         |               |            |     |     |                   |           |               |            |     |      |       |     |               |            |     |     |       |     |               |            |     |     |       |           |               |            |     |     |       |          |               |            |     |     |                   |           |               |            |     |      |       |     |               |            |     |      |       |     |               |            |    |      |       |     |               |            |     |     |                   |           |               |            |     |     |       |           |               |            |     |     |       |           |               |            |     |     |       |           |               |            |     |     |       |           |               |            |     |     |       |          |               |            |     |      |       |     |               |            |     |     |       |           |               |            |     |     |       |           |               |            |     |     |       |           |
| STROP_RS05205                                                                                 | ABP73641.1   | 100        | 522               | 100.0             | 1.31e-190                                                                                                                                                                                                                                                                                                                                                                                                                                                                                                                                                                                                                                                                                                                                                                                                                                                                                                                                                                                                                                                                                                                                                                                                                                                                                                                                                                                                                                                                                                                                                                                                                                                                                                                                                                                                                                                                                                                                                                                                                                                                                                                                                                                                                                                                                                                                                                                                                                                                                                                                                                                                                                                                                                                                                                                                                                                                                                                                                                                                                                                                                                                                                                                                                                                                                                                                                                                                                                                                                                                                                                                                                                                                                                                                                                                                                                                                                                                                                                                                                                                                                                                              |      |            |            |      |            |      |            |      |            |        |            |      |            |        |            |      |            |      |            |      |            |      |            |      |            |      |            |      |            |      |            |      |            |      |            |      |            |      |            |      |            |      |            |      |            |              |            |             |            |         |               |            |     |     |                   |           |               |            |     |      |       |     |               |            |     |     |       |     |               |            |     |     |       |           |               |            |     |     |       |          |               |            |     |     |                   |           |               |            |     |      |       |     |               |            |     |      |       |     |               |            |    |      |       |     |               |            |     |     |                   |           |               |            |     |     |       |           |               |            |     |     |       |           |               |            |     |     |       |           |               |            |     |     |       |           |               |            |     |     |       |          |               |            |     |      |       |     |               |            |     |     |       |           |               |            |     |     |       |           |               |            |     |     |       |           |
| STROP_RS05210                                                                                 | ABP73640.1   | 100        | 578               | 100.0             | 2.04e-212                                                                                                                                                                                                                                                                                                                                                                                                                                                                                                                                                                                                                                                                                                                                                                                                                                                                                                                                                                                                                                                                                                                                                                                                                                                                                                                                                                                                                                                                                                                                                                                                                                                                                                                                                                                                                                                                                                                                                                                                                                                                                                                                                                                                                                                                                                                                                                                                                                                                                                                                                                                                                                                                                                                                                                                                                                                                                                                                                                                                                                                                                                                                                                                                                                                                                                                                                                                                                                                                                                                                                                                                                                                                                                                                                                                                                                                                                                                                                                                                                                                                                                                              |      |            |            |      |            |      |            |      |            |        |            |      |            |        |            |      |            |      |            |      |            |      |            |      |            |      |            |      |            |      |            |      |            |      |            |      |            |      |            |      |            |      |            |      |            |              |            |             |            |         |               |            |     |     |                   |           |               |            |     |      |       |     |               |            |     |     |       |     |               |            |     |     |       |           |               |            |     |     |       |          |               |            |     |     |                   |           |               |            |     |      |       |     |               |            |     |      |       |     |               |            |    |      |       |     |               |            |     |     |                   |           |               |            |     |     |       |           |               |            |     |     |       |           |               |            |     |     |       |           |               |            |     |     |       |           |               |            |     |     |       |          |               |            |     |      |       |     |               |            |     |     |       |           |               |            |     |     |       |           |               |            |     |     |       |           |
| STROP_RS05215                                                                                 | ABP73639.1   | 100        | 419               | 100.0             | 6.9e-151                                                                                                                                                                                                                                                                                                                                                                                                                                                                                                                                                                                                                                                                                                                                                                                                                                                                                                                                                                                                                                                                                                                                                                                                                                                                                                                                                                                                                                                                                                                                                                                                                                                                                                                                                                                                                                                                                                                                                                                                                                                                                                                                                                                                                                                                                                                                                                                                                                                                                                                                                                                                                                                                                                                                                                                                                                                                                                                                                                                                                                                                                                                                                                                                                                                                                                                                                                                                                                                                                                                                                                                                                                                                                                                                                                                                                                                                                                                                                                                                                                                                                                                               |      |            |            |      |            |      |            |      |            |        |            |      |            |        |            |      |            |      |            |      |            |      |            |      |            |      |            |      |            |      |            |      |            |      |            |      |            |      |            |      |            |      |            |      |            |              |            |             |            |         |               |            |     |     |                   |           |               |            |     |      |       |     |               |            |     |     |       |     |               |            |     |     |       |           |               |            |     |     |       |          |               |            |     |     |                   |           |               |            |     |      |       |     |               |            |     |      |       |     |               |            |    |      |       |     |               |            |     |     |                   |           |               |            |     |     |       |           |               |            |     |     |       |           |               |            |     |     |       |           |               |            |     |     |       |           |               |            |     |     |       |          |               |            |     |      |       |     |               |            |     |     |       |           |               |            |     |     |       |           |               |            |     |     |       |           |
| STROP_RS05220                                                                                 | ABP73638.1   | 100        | 2221              | 100.0             | 0.0                                                                                                                                                                                                                                                                                                                                                                                                                                                                                                                                                                                                                                                                                                                                                                                                                                                                                                                                                                                                                                                                                                                                                                                                                                                                                                                                                                                                                                                                                                                                                                                                                                                                                                                                                                                                                                                                                                                                                                                                                                                                                                                                                                                                                                                                                                                                                                                                                                                                                                                                                                                                                                                                                                                                                                                                                                                                                                                                                                                                                                                                                                                                                                                                                                                                                                                                                                                                                                                                                                                                                                                                                                                                                                                                                                                                                                                                                                                                                                                                                                                                                                                                    |      |            |            |      |            |      |            |      |            |        |            |      |            |        |            |      |            |      |            |      |            |      |            |      |            |      |            |      |            |      |            |      |            |      |            |      |            |      |            |      |            |      |            |      |            |              |            |             |            |         |               |            |     |     |                   |           |               |            |     |      |       |     |               |            |     |     |       |     |               |            |     |     |       |           |               |            |     |     |       |          |               |            |     |     |                   |           |               |            |     |      |       |     |               |            |     |      |       |     |               |            |    |      |       |     |               |            |     |     |                   |           |               |            |     |     |       |           |               |            |     |     |       |           |               |            |     |     |       |           |               |            |     |     |       |           |               |            |     |     |       |          |               |            |     |      |       |     |               |            |     |     |       |           |               |            |     |     |       |           |               |            |     |     |       |           |
| STROP_RS05225                                                                                 | ABP73637.1   | 100        | 656               | 100.0             | 6.28e-241                                                                                                                                                                                                                                                                                                                                                                                                                                                                                                                                                                                                                                                                                                                                                                                                                                                                                                                                                                                                                                                                                                                                                                                                                                                                                                                                                                                                                                                                                                                                                                                                                                                                                                                                                                                                                                                                                                                                                                                                                                                                                                                                                                                                                                                                                                                                                                                                                                                                                                                                                                                                                                                                                                                                                                                                                                                                                                                                                                                                                                                                                                                                                                                                                                                                                                                                                                                                                                                                                                                                                                                                                                                                                                                                                                                                                                                                                                                                                                                                                                                                                                                              |      |            |            |      |            |      |            |      |            |        |            |      |            |        |            |      |            |      |            |      |            |      |            |      |            |      |            |      |            |      |            |      |            |      |            |      |            |      |            |      |            |      |            |      |            |              |            |             |            |         |               |            |     |     |                   |           |               |            |     |      |       |     |               |            |     |     |       |     |               |            |     |     |       |           |               |            |     |     |       |          |               |            |     |     |                   |           |               |            |     |      |       |     |               |            |     |      |       |     |               |            |    |      |       |     |               |            |     |     |                   |           |               |            |     |     |       |           |               |            |     |     |       |           |               |            |     |     |       |           |               |            |     |     |       |           |               |            |     |     |       |          |               |            |     |      |       |     |               |            |     |     |       |           |               |            |     |     |       |           |               |            |     |     |       |           |
| STROP_RS05230                                                                                 | ABP73636.1   | 100        | 305               | 100.0             | 3.37e-108                                                                                                                                                                                                                                                                                                                                                                                                                                                                                                                                                                                                                                                                                                                                                                                                                                                                                                                                                                                                                                                                                                                                                                                                                                                                                                                                                                                                                                                                                                                                                                                                                                                                                                                                                                                                                                                                                                                                                                                                                                                                                                                                                                                                                                                                                                                                                                                                                                                                                                                                                                                                                                                                                                                                                                                                                                                                                                                                                                                                                                                                                                                                                                                                                                                                                                                                                                                                                                                                                                                                                                                                                                                                                                                                                                                                                                                                                                                                                                                                                                                                                                                              |      |            |            |      |            |      |            |      |            |        |            |      |            |        |            |      |            |      |            |      |            |      |            |      |            |      |            |      |            |      |            |      |            |      |            |      |            |      |            |      |            |      |            |      |            |              |            |             |            |         |               |            |     |     |                   |           |               |            |     |      |       |     |               |            |     |     |       |     |               |            |     |     |       |           |               |            |     |     |       |          |               |            |     |     |                   |           |               |            |     |      |       |     |               |            |     |      |       |     |               |            |    |      |       |     |               |            |     |     |                   |           |               |            |     |     |       |           |               |            |     |     |       |           |               |            |     |     |       |           |               |            |     |     |       |           |               |            |     |     |       |          |               |            |     |      |       |     |               |            |     |     |       |           |               |            |     |     |       |           |               |            |     |     |       |           |
| STROP_RS05235                                                                                 | ABP73635.1   | 100        | 537               | 100.0             | 1.94e-196                                                                                                                                                                                                                                                                                                                                                                                                                                                                                                                                                                                                                                                                                                                                                                                                                                                                                                                                                                                                                                                                                                                                                                                                                                                                                                                                                                                                                                                                                                                                                                                                                                                                                                                                                                                                                                                                                                                                                                                                                                                                                                                                                                                                                                                                                                                                                                                                                                                                                                                                                                                                                                                                                                                                                                                                                                                                                                                                                                                                                                                                                                                                                                                                                                                                                                                                                                                                                                                                                                                                                                                                                                                                                                                                                                                                                                                                                                                                                                                                                                                                                                                              |      |            |            |      |            |      |            |      |            |        |            |      |            |        |            |      |            |      |            |      |            |      |            |      |            |      |            |      |            |      |            |      |            |      |            |      |            |      |            |      |            |      |            |      |            |              |            |             |            |         |               |            |     |     |                   |           |               |            |     |      |       |     |               |            |     |     |       |     |               |            |     |     |       |           |               |            |     |     |       |          |               |            |     |     |                   |           |               |            |     |      |       |     |               |            |     |      |       |     |               |            |    |      |       |     |               |            |     |     |                   |           |               |            |     |     |       |           |               |            |     |     |       |           |               |            |     |     |       |           |               |            |     |     |       |           |               |            |     |     |       |          |               |            |     |      |       |     |               |            |     |     |       |           |               |            |     |     |       |           |               |            |     |     |       |           |

**Supplementary Figure S1.** MariClus database view of the species details for *Salinispora tropica*. The page shows the information about the species, such as its taxonomic lineage, genome assembly, publications and culture collection number. It also shows the list of clusters and molecules predicted for the species. The molecule Salinosporamide A is highlighted in the table as this was our search query. The evidence for the second occurrence of the molecule in this species has been expanded, showing more information about the corresponding MIBiG cluster, the number of BLAST hits and the scores of each hit to the MIBiG cluster. The user can access the antiSMASH pages of the cluster and the molecule by clicking on the icons. The view is limited to the clusters of interest.

## Taxonomy Browser

| Selected taxa                                |                                                               |
|----------------------------------------------|---------------------------------------------------------------|
| Terrabacteria group                          | Pseudomonadota (purple photosynthetic bacteria and relatives) |
| FCB group                                    | PVC group                                                     |
| Thermodesulfobacteriota                      |                                                               |
| Campylobacterota (e-proteobacteria)          | Euryarchaeota (euryarchaeotes)                                |
| TACK group                                   | Enter one or more taxonomic names                             |
|                                              |                                                               |
| Taxonomic name                               | Genomes                                                       |
| ▼ <i>Bacteria</i> (bacteria)                 | 1,594,016                                                     |
| > <i>FCB group</i>                           | 63,407                                                        |
| > <i>Pseudomonadota</i> (proteobacteria)     | 981,346                                                       |
| > <i>Terrabacteria group</i>                 | 398,002                                                       |
| > <i>Thermodesulfobacteriota</i>             | 3,772                                                         |
| > <i>Campylobacterota</i> (e-proteobacteria) | 92,269                                                        |
| > <i>PVC group</i>                           | 14,413                                                        |
| ▼ <i>Archaea</i> (archaea)                   | 15,322                                                        |
| > <i>TACK group</i>                          | 3,321                                                         |
| > <i>Euryarchaeota</i> (euryarchaeotes)      | 4,711                                                         |

**Supplementary Figure S2.** NCBI taxonomy browser results for the top 8 phyla of the MariClus database. The table shows the taxonomic names and the number of genomes in each phylum. The Pseudomonadota and Terrabacteria group together account for more than 80% of all entries in the bacteria superkingdom (Sayers *et al.* 2022)[16].

## References

Sayers, Eric W., Evan E. Bolton, J. Rodney Brister, Kathi Canese, Jessica Chan, Donald C. Comeau, Ryan Connor, et al. 2022. "Database Resources of the National Center for Biotechnology Information." *Nucleic Acids Research* 50 (D1): D20–26. <https://doi.org/10.1093/nar/gkab1112>.
